# Supplementary material
Source: PubMed Central journal article supplement (PMC2840116)
Supplement: 0914360107_pnas.200914360SI.pdf [file 0914360107_pnas.200914360SI.pdf]

# Supporting Information

Krause et al. 10.1073/pnas.0914360107

## SI Experimental Procedures

**Agonists and Antagonists.** Troglitazone, rosiglitazone, pioglitazone, ciglitazone, GW9662, and BIO were acquired commercially (Calbiochem). Dkk-1 was prepared from a recombinant source as described (1).

**Tissue Culture.** Human MSCs were cultured in  $\alpha$ -MEM (Invitrogen, Carlsbad, CA) containing 20% (vol/vol) FBS (Atlanta Biologicals), 100 units·mL<sup>-1</sup> penicillin, 1  $\mu$ g·mL<sup>-1</sup> streptomycin, and 4 mM L-glutamine. For expansion, cells were plated at an initial seeding density of 100 cells/cm<sup>2</sup> and allowed to divide for six to eight doublings until 40–50% confluent. For repassage and experiments, MSCs were recovered with trypsin/EDTA mixture (Invitrogen).

**ALP Assays.** Osteoblastogenesis was induced on confluent monolayers in 6- to 24-well plates by addition of complete culture medium supplemented with 5 mM sodium glycerophosphate and 50  $\mu$ g·mL<sup>-1</sup> L-ascorbate. Inhibitors were added to the conditions where appropriate (acquired from Calbiochem, San Diego, and Sigma Aldrich). Medium was changed every 48 h. After 8–10 days, a measurement of ALP activity was to be carried out on the monolayers. The cells were washed once with PBS, then with 100 mM Tris·HCl (pH 9.0) containing 100 mM KCl and 1 mM MgCl<sub>2</sub> (ALP buffer). After washing, 1.5 mL of a 1:2 solution of PNPP (Fisher) and ALP buffer was added to the wells to produce a 5-mm path length between the bottom of the well and the meniscus. ALP activity as a function of PNPP metabolism ( $\Delta$ OD<sub>405</sub> min<sup>-1</sup>) was measured by using a temperature-controlled automated plate reader (FluoStar; BMG Biotech). The rates were compared against standards with a known concentration of ALP and normalized against cell number.

**Cell Cycle Assays.** Cells were recovered by trypsinization, rinsed in PBS, and fixed for 4 h in 70% (vol/vol) ethanol. Pellets were then resuspended in PBS containing 0.1% (wt/vol) BSA (Sigma), 20 mg·mL<sup>-1</sup> RNase A (Invitrogen), and 50 mg·mL<sup>-1</sup> propidium iodide (Sigma). Profiles were generated by fluorescent activated cell sorting (Becton Coulter FC500) and analyzed with modeling software (MultiCycleAV; Phoenix Flow Systems).

**Microarray Processing.** RNA quality and quantity was determined with capillary electrophoresis (Experion; Bio-Rad) by using RNA Nano Kit (Bio-Rad). Total of 1.4–4.0  $\mu$ g of total RNA was used for one-cycle target labeling assay according to manufacturer's instructions (Affymetrix). Briefly, Poly-A RNA spike in controls were added to each sample, and double-stranded cDNA was synthesized by using One-Cycle cDNA Synthesis Kit (Affymetrix). Double-stranded cDNA was cleaned with Sample Cleanup Module (Affymetrix) followed by synthesis of biotin-labeled cRNA using the GeneChip IVT Labeling Kit (Affymetrix). Biotin-labeled cRNA was cleaned with Sample Cleanup Module and quantified with spectrophotometer (SmartSpec; Bio-Rad). A total of 20  $\mu$ g of biotin-labeled cRNA was used for fragmentation by using the Sample Cleanup Module. The labeled and fragmented cRNA was hybridized on to HG-U133 Plus 2.0 (Affymetrix) arrays with hybridization controls from the GeneChip Hybridization, Wash, and Stain Kit (Affymetrix) in Hybridization Oven 450 (Affymetrix). After 16 h of hybridization, the arrays were washed and stained in Fluidics Station 450 (Affymetrix) by using the GeneChip Hybridization, Wash, and Stain Kit. The arrays were then scanned by using the GeneChip Scanner G7 (Affymetrix). Command Console (Affymetrix) software was used to run the instruments and perform quality control of the samples.

**Microarray Data Analysis.** The microarray image files (CEL files) were transferred to Partek Genomics Suite (Partek) for data analysis. The arrays were normalized by using RMA (robust multichip analysis) algorithm. The data were filtered by comparing each array to DMSO control and keeping the genes that showed at least 2-fold up- or down-regulation in their expression level. The lists of genes were also studied for GeneOntology enrichment. All of the differentially expressed genes (5,077 genes) were combined into one list and their gene expression values were standardized, and used for hierarchical clustering. Eight clusters were selected on the same level of hierarchy (distance 1.4–1.6) and studied for GeneOntology enrichment.

**ELISA.** ELISA for CXCL6, Dkk-1, GRO $\alpha$ , GRO $\beta$ , and OPG were carried out by using nonbiotinylated polyclonal capture antibodies and biotinylated detection antibodies that were commercially acquired (R&D Systems and PromoKine) on Nunc Immunosorp coated 96-well plates (Fisher Lifesciences). The biotinylated capture antibodies were detected by using horseradish peroxidase-conjugated streptavidin and TMB substrate (Pierce). ELISA for IL-1b were performed by using commercially acquired kits.

**Antibody Array.** Microarray data of secreted cytokines were confirmed by using a membrane-based antibody array to test for the relative concentrations of 174 proteins as recommended by the manufacturer (RayBio Human Cytokine Array; RayBiotech). In brief, culture supernatants from 8-day drug- or vehicle-treated MSCs were collected from two donors after 24 h. Membranes were blocked and incubated with 3 mL of supernatant each overnight on an orbital shaker at 4 °C. After washing, membranes were incubated with biotinylated antibodies for 3 h at room temperature and developed by using streptavidin-conjugated horseradish peroxidase and an ECL substrate. Chemiluminescence was detected on a Versadoc Imaging System and analyzed by using QuantityOne software (Bio-Rad). After local background subtraction, the mean volume of duplicate spots for each protein was normalized to the average volume of the six internal positive controls on each membrane. Data are expressed as relative intensity values. Membranes incubated with culture medium containing 20% (vol/vol) FBS showed negligible background cross-reactivity.

**Cell Counting.** Cells were recovered by trypsinization and pelleted. The number of cells per well were then measured by nucleic acid fluorescence incorporation assay. The cells were added to 2 $\times$  CyQuant dye solution (Invitrogen) containing 1 unit per mL of EcoRI and BamHI (Invitrogen) to lyse the cells and release the DNA from the protein. Nucleic acid interchelation-induced fluorescence was measured by using a microplate fluorescence reader (FLx800; Bio-Tek Instruments) set to 480-nm excitation and 520-nm emission. The degree of fluorescence is directly proportional to cell number when compared against known standards.

**Late-Stage Osteogenesis and Alizarin Red Staining.** Confluent cultures of MSCs were incubated in complete osteogenic medium consisting of osteogenic base media containing 10<sup>-8</sup> M dexamethasone (Sigma) with the appropriate inhibitor or vehicle. Media was changed every 2 days until the conclusion of the assay. Alizarin red staining, back extraction, and quantification were performed as described (2). Stained monolayers were photographed by using a Nikon Eclipse TE200 inverted microscope fitted with a Nikon DXM1200F digital camera.

**Western Blotting Antibodies.** The following antibodies were used: mouse anti-human GAPDH (clone 6C5; Chemicon International), mouse anti-human  $\beta$ -catenin (clone 5H10; Chemicon), mouse anti-human GSK3 $\beta$  (clone M131; Abcam), PPAR gamma (clone 1E6A1; Abcam), and rabbit anti-cleaved caspase 3 (Abcam). Secondary antibodies were goat anti-mouse Ig-peroxidase conjugate and goat anti-rabbit peroxidase conjugate (Fisher Lifesciences). Film development was carried out as previously described (3). Silver staining was performed by using a commercially available kit (Invitrogen).

**Clotted Plasma Coculture.** Confluent monolayers of MSCs were generated in wells of a 12-well tissue culture plate. Clotting human plasma was prepared by suspending freeze-dried human plasma (Sigma) to 2 $\times$  concentration and combining the solution with an equal volume of 1 $\times$  thromboplastin C (Fisher Lifesciences). To slow clotting, the components and mixture was maintained on ice. Media was removed from the confluent cultures, washed in PBS and, with the plates held at an angle of  $\approx 20^\circ$ , 200  $\mu$ L of the plasma mixture was added to each well so as to cover  $\approx 30\%$  of the surface area. After the plasma had clotted (5 min), osteogenic media was carefully added to cover the monolayer and plasma. Osteogenic assays were then performed by using standard media preparations.

**Calvarial Lesions.** MSCs were cultured in the presence of osteogenic base media containing the appropriate inhibitor or vehicle with media changes every 2 days. After 8 days of in vitro conditioning, they were recovered, suspended in commercially acquired human plasma at 20 million cells per mL. Under an institutionally approved animal use protocol, nude mice (Jackson Laboratories) received a 3-mm circular lesion in the frontal or parietal calvarial bones, 1–2 mm from the sagittal and coronal sutures. The chilled cell suspension (50  $\mu$ L) was added to an equal volume of thromboplastin and administered to the lesion. After clotting, the scalp was to be closed by suture and tissue glue. Subsequent doses of cells were administered by direct injection in plasma/thromboplastin mix.

**X-Ray Imaging and Quantification.** In accordance with an institutionally approved animal use protocol, cranial bones were dissected out of euthanized mice and gently cleared of connective tissue. The bones were imaged by x-ray (Faxitron M20) with a 30-KV beam for 15 s. Digital images were to be captured on a digital plate and processed on a PhosphorImager reader (PMI; Bio-Rad). Images were processed by volume analysis software (Quantity One; Bio-Rad). The degree of radio-opacity at comparable regions of interest on the lesioned and contralateral side was defined as the reciprocal of the pixel volume intensity. Results were presented as the percent radio-opacity at the lesion with the unaffected contralateral side set to 100 percent.

**Histochemistry and Immunocytochemistry.** For nuclear localization studies, hMSCs were fixed in 4% (vol/vol) paraformaldehyde for 15 min and blocked/permeabilized in PBS containing 2% (vol/vol) goat serum (Sigma) and 0.1% (vol/vol) Triton X-100. A cy-3 labeled monoclonal antibody (clone 15B8; Sigma) was used to detect  $\beta$ -catenin, and nuclei were counterstained with Pico green DNA dye (Invitrogen).

Calvaria were fixed in 4% (wt/vol) paraformaldehyde for 15 h, then decalcified for 48 h in PBS containing 1 M disodium-EDTA (EDTA). Specimens were then washed three times with 50 mL of PBS for 2 h at 4  $^\circ$ C. Specimens were processed as paraffin blocks and 8- $\mu$ m longitudinal sections were prepared, deparaffinized, and rehydrated, then stained with hematoxylin and eosin (Sigma). For immunocytochemistry, rehydrated sections were treated with 3% (vol/vol) hydrogen peroxide for 15 min at room temperature, washed in PBS, then blocked in PBS containing 2% (vol/vol) goat serum (Sigma) and 0.1% (vol/vol) Triton X-100. An anti-human  $\beta$ -2-microglobulin antibody was employed to detect human cells (Abcam, Cambridge, MA). Secondary detection was achieved by using the Alexafluor series of antibodies. An upright fluorescent microscope (Eclipse H600L; Nikon) fitted with a high performance camera (Retiga 2000R), and image analysis software (NIS-Elements; Nikon) was employed for imaging.

**Tetracycline Tracing of in Vivo Calcium Deposition.** Animals received s.c. injections of tetracycline (25 mg/kg) 10 days before euthanasia in accordance with an institutionally approved animal use protocol. After fixation under vacuum and agitation, the specimens were dehydrated in several changes of graded EtOH solutions and cleared with xylenes and then 100% methyl methacrylate (MMA). Specimens were then infiltrated for  $\approx 2$  weeks under vacuum with three solutions of MMA and dibutyl phthalate (DBP). After the infiltration period, the specimens were then embedded in a fresh solution of MMA + DBP + Perkadox-16 (P16). Using the combination of room temperature, a refrigerator, a waterbath, and an oven, the specimens were allowed to polymerize (harden) over a period of  $\approx 3$ –5 days. Thin-section microtomy (5 microns) was performed by using a motorized rotary microtome (Leica Microsystems) and a tungsten-carbide knife (Dorn and Hart Microedge). Sections were then deplastified and visualized by using an upright fluorescent microscope (Eclipse H600L; Nikon) fitted with a high performance camera (Retiga 2000R) and image analysis software (NIS-Elements; Nikon) was employed for imaging. Embedding, sectioning, and mounting was outsourced to J. L. Ratcliff (Franklin, TN).

**Semiquantitative Blood Vessel Measurements.** Calvaria were fixed, decalcified, and sectioned in paraffin and stained with hematoxylin and eosin as described. Two-dimensional regions of interest (ROI) were carefully defined and normalized for all specimens. For this purpose, 6- $\mu$ m-thick longitudinal serial sections were prepared, and those sections containing tissue up to and including 0.5 mm above and below the diameter of the lesion. These were included in the measurements. A 6- $\mu$ m section was counted every 30  $\mu$ m (34 sections) within the entire region of interest, which consisted of the longitudinal thickness of the lesion (the thickness of the bone and adjacent fibrous tissue) by the original width of the lesion in one dimension (3 mm) and 0.5 mm above and below the original diameter of the lesion in the final dimension. Using NIS-Elements image analysis software, the surface area of blood vessels in the 2D ROI was calculated for each section and totaled. The values were expressed as the mean of total blood vessel area from three animals per group.

1. van der Horst G, et al. (2005) Downregulation of Wnt signaling by increased expression of Dickkopf-1 and -2 is a prerequisite for late-stage osteoblast differentiation of KS483 cells. *J Bone Miner Res* 20:1867–1877.

2. Gregory C-A, Gunn W-G, Peister A, Prockop D-J (2004) An Alizarin red-based assay of mineralization by adherent cells in culture: comparison with cetylpyridinium chloride extraction. *Anal Biochem* 329:77–84.

3. Damiens E, Baratte B, Marie D, Eisenbrand G, Meijer L (2001) Anti-mitotic properties of indirubin-3'-monoxime, a CDK/GSK-3 inhibitor: induction of endoreplication following prophase arrest. *Oncogene* 20:3786–3797.





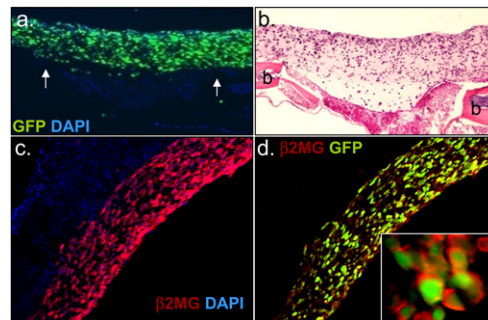

**Fig. S5.** Immunohistochemistry of 24-h-old calvarial lesions loaded with GFP-labeled hMSCs. (A and B) GFP-labeled hMSCs administered above the lesion (arrowed). (C and D) Immunocytochemistry for hMSCs by using an anti-human  $\beta$ -2 microglobulin antibody. The staining is localized exclusively to the GFP-labeled hMSCs, with the expected membranous distribution (D Inset).

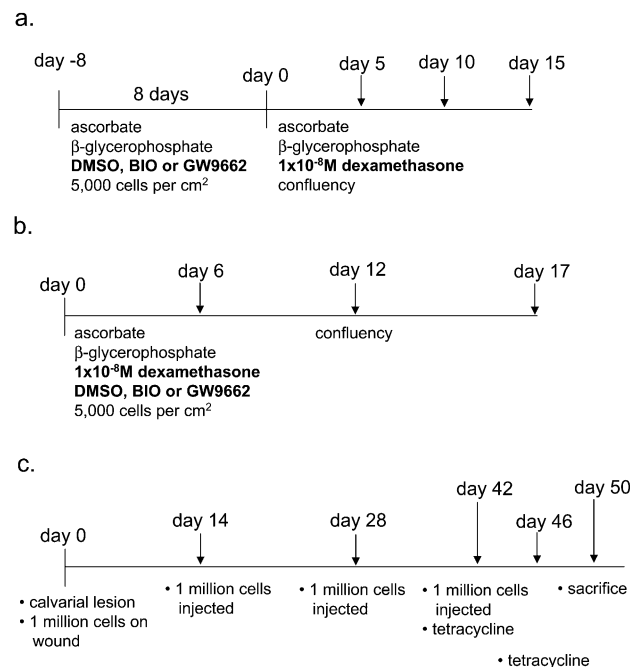

**Fig. S6.** Experimental timelines. (A) Assay of BIO and GW pretreatment on late-stage osteogenesis (Fig. 4). (B) Assay of simultaneous BIO and GW treatment on late-stage osteogenesis (Fig. 5). (C) Assay of in vivo bone repair (Fig. 6).

**Table S1.** Up-regulated Wnt target genes in BIO- and GW-treated hMSCs. Comparison with Wnt3a-treated human fibroblasts (Klapholz-Brown et al., 2007).

**Significantly up-regulated in Wnt3a treated fibroblasts and both BIO and GW treated hMSCs.**

Klf-6, caldesmon-1, gamma-aminobutyric acid B receptor-2, synaptotagmin like-2

**Significantly up-regulated in Wnt3a treated fibroblasts and BIO treated hMSCs only (GW, no change).**

Protocadherin-7, PR domain containing-1, gremlin-1, collectin subfamily member-12, stanniocalcin-2

**Significantly up-regulated in Wnt3a treated fibroblasts GW treated hMSCs only (BIO, no change).**

Fibroblast growth factor-7, high mobility group AT-hook 2, Cdk5 and Abl enzyme substrate-1, amyloid beta precursor protein-binding family B2

**Significantly up-regulated in Wnt3a treated fibroblasts but down-regulated in both BIO and GW treated hMSCs.**

Transducin-like enhancer of split-1

Klapholz-Brown Z, Walmsley GG, Nusse YM, Nusse R, Brown PO (2007) Transcriptional program induced by Wnt protein in human fibroblasts suggests mechanisms for cell cooperativity in defining tissue microenvironments. *PLoS One* 2:e945.





| Function                                                                                     | Score   |
|----------------------------------------------------------------------------------------------|---------|
| Highly down-regulated in BIO-treated MSCs, moderately down-regulated in GW9662-treated MSCs. |         |
| Thrombin receptor activity                                                                   | 28.0695 |
| Trans-1,2-dihydrobenzene-1,2-diol dehydrogenase activity                                     | 28.0695 |
| 3-Alpha-hydroxysteroid dehydrogenase (A-specific) activity                                   | 22.5322 |
| Prostanoid metabolic process                                                                 | 17.3850 |
| Prostaglandin metabolic process                                                              | 17.3850 |
| Phospholipid scrambling                                                                      | 14.8662 |
| Phospholipid scramblase activity                                                             | 14.8662 |
| Bile acid binding                                                                            | 14.8662 |
| Acetylgalactosaminyltransferase activity                                                     | 13.6365 |
| Platelet-derived growth factor receptor activity                                             | 12.6591 |
| Response to dsRNA                                                                            | 12.6591 |
| Prostaglandin E receptor activity                                                            | 12.6591 |
| Indole and derivative metabolic process                                                      | 12.6591 |
| Indole derivative metabolic process                                                          | 12.6591 |
| Regulation of ossification                                                                   | 12.3625 |
| Carboxylic acid binding                                                                      | 10.9963 |
| 3',5'-Cyclic-nucleotide phosphodiesterase activity                                           | 10.7854 |
| Steroid dehydrogenase activity, acting on the CH-OH group of donors, NAD or NADP as acceptor | 10.3329 |
| Cyclic-nucleotide phosphodiesterase activity                                                 | 10.3329 |
| Adenylate kinase activity                                                                    | 9.69717 |
| Integrin complex                                                                             | 8.79613 |
| Highly down-regulated in GW9662 treated MSCs, moderately down-regulated in BIO-treated MSCs  |         |
| Sphingomyelin biosynthetic process                                                           | 21.4244 |
| Extracellular region                                                                         | 18.6676 |
| Sphingomyelin synthase activity                                                              | 16.4884 |
| Ceramide cholinephosphotransferase activity                                                  | 16.4884 |
| Cytoplasmic part                                                                             | 16.1805 |
| Stearoyl-CoA 9-desaturase activity                                                           | 12.2139 |
| Intracellular part                                                                           | 11.1996 |
| Intracellular organelle part                                                                 | 10.5470 |
| Y-form DNA binding                                                                           | 9.62809 |
| Transcription, RNA-dependent                                                                 | 9.62809 |
| Negative regulation of retroviral genome replication                                         | 9.62809 |
| Ubiquitin-dependent protein catabolic process                                                | 9.59400 |
| Endoplasmic reticulum                                                                        | 9.49858 |
| Modification-dependent protein catabolic process                                             | 9.35670 |
| Golgi-associated vesicle                                                                     | 8.89415 |
| Signal transduction                                                                          | 8.86723 |
| Extracellular region part                                                                    | 8.62576 |
| Nucleosome assembly                                                                          | 8.59450 |
| Protein import                                                                               | 8.48681 |
| Nucleosome                                                                                   | 8.18840 |
| Regulation of defense response to virus by host                                              | 8.02484 |
| Extracellular space                                                                          | 7.99858 |

Enrichment scores are derived from *P* values ( $10^{-\text{enrichment score}} = P$  value against the probability that a given gene clustered based on chance alone).



**Table S8. Cell counts from lesioned calvaria after 50 days of treatment**

| Treatment | Animal number |     |     | Mean   | SD    | <i>P</i> (Student's <i>t</i> test) |
|-----------|---------------|-----|-----|--------|-------|------------------------------------|
|           | 1             | 2   | 3   |        |       |                                    |
| DMSO      | 235           | 141 | 206 | 194    | 48.13 | Versus DMSO                        |
| BIO200    | 12            | 52  | 0   | 21.33  | 27.23 | 0.0057                             |
| BIO800    | 11            | 0   | 31  | 14     | 15.72 | 0.003                              |
| GW1.0     | 362           | 188 | 247 | 260.67 | 90.47 | ns                                 |
| GW10.0    | 341           | 215 | 232 | 262.67 | 68.36 | ns                                 |

ns, not significant.
